# Supplementary material
Source: PubMed Central journal article supplement (PMC7323136)
Supplement: ACEM-27-653-s001.pdf [file ACEM-27-653-s001.pdf]

## DATA SUPPLEMENT S1. APPENDIX

### Covid-19

"COVID-19"[Supplementary Concept] OR "COVID-19 diagnostic testing"[Supplementary Concept] OR "COVID-19 drug treatment"[Supplementary Concept] OR "COVID-19 vaccine"[Supplementary Concept] OR "COVID-19 serotherapy" [Supplementary Concept] and "new corona virus" OR "severe acute respiratory syndrome coronavirus 2"[Supplementary Concept] OR "spike glycoprotein, COVID-19 virus"[Supplementary Concept] OR "2019-nCoV" OR "2019nCoV" OR "cov 2" OR "Covid-19" OR "sars coronavirus 2" OR "sars cov 2" OR "SARS-CoV-2" OR "severe acute respiratory syndrome coronavirus 2" OR "coronavirus 2" OR "COVID 19" OR "COVID-19" OR "2019 ncov" OR "2019nCoV" OR "corona virus disease 2019" OR "cov2" OR "COVID-19" OR "COVID19" OR "nCov 2019" OR "nCoV" OR "new coronaviruses" OR "novel corona virus" OR "novel coronaviruses" OR "SARS Coronavirus 2" OR "SARS2" OR "SARS-COV-2" OR "Severe Acute Respiratory Syndrome Coronavirus 2" OR ((19[tiab] OR 2019[tiab] OR "2019-nCoV" OR "Beijing" OR "China" OR "Covid-19" OR epidem\*[tiab] OR epidemic\* OR epidemy OR new[tiab] OR "novel"[tiab] OR "outbreak" OR pandem\* OR "SARS-CoV-2" OR "Shanghai" OR "Wuhan") AND ("Coronavirus Infections"[Mesh] OR "coronavirus"[MeSH Terms] OR coronavirus\*[all] OR corona-virus\*[all] OR cov[tiab] OR pneumonia-virus\*[tiab]))

### Testing

"Polymerase Chain Reaction"[MeSH] OR "Reverse Transcriptase Polymerase Chain Reaction"[MeSH] OR "High-Throughput Nucleotide Sequencing"[MeSH] OR "Sensitivity and Specificity"[MeSH] OR "Point-of-Care

Testing"[MeSH] OR "Antigens"[MeSH] OR "Serology"[MeSH] OR "Immunoglobulin G"[MeSH] OR "Immunoglobulin M"[MeSH] OR "Clustered Regularly Interspaced Short Palindromic Repeats"[MeSH] OR "CRISPR-Cas Systems"[MESH] OR "Diagnosis, Differential"[MESH] OR pcr[tiab] OR "digital droplet"[tiab] OR "next generation sequencing"[tiab] OR "point-of-care test"[tiab] OR "point of care tests"[tiab] OR antigen[tiab] OR analyte[tiab] OR serology[tiab] OR Immunoglobulin[tiab] OR "CRISPR-CAS"[tiab] OR Diagnos\*[tiab] OR "turn around time"[tiab]

Filters: Publication date from 2020/01/01 to 2020/12/31, ENGLISH

### Embase:

'coronavirus disease 2019'/exp OR 'covid 19'/exp OR ('2019-nCoV' OR '2019nCoV' OR 'cov 2' OR 'Covid-19' OR 'sars coronavirus 2' OR 'sars cov 2' OR 'SARS-CoV-2' OR 'severe acute respiratory syndrome coronavirus 2' OR 'coronavirus 2' OR 'COVID 19' OR 'COVID-19' OR '2019 ncov' OR '2019nCoV' OR 'corona virus disease 2019' OR 'cov2' OR 'COVID-19' OR 'COVID19' OR 'nCov 2019' OR 'nCoV' OR 'new corona virus' OR 'new coronaviruses' OR 'novel corona virus' OR 'novel coronaviruses' OR 'SARS Coronavirus 2' OR 'SARS2' OR 'SARS-COV-2' OR 'Severe Acute Respiratory Syndrome Coronavirus 2'):ti,ab,kw OR ((19 OR 2019 OR '2019-nCoV' OR 'Beijing' OR 'China' OR 'Covid-19' OR epidem\* OR epidemic\* OR epidemy OR new OR 'novel' OR 'outbreak' OR pandem\* OR 'SARS-CoV-2' OR 'Shanghai' OR 'Wuhan'):ti,ab,kw AND ('Coronavirinae'/exp OR 'Coronavirus infection'/exp OR coronavirus\*:ti,ab,kw OR corona-virus\*:ti,ab,kw OR cov:ti,ab,kw OR 'pneumonia-virus\*':ti,ab,kw))

### Testing

'Polymerase Chain Reaction'/exp OR 'reverse transcription polymerase chain reaction'/exp

OR 'high throughput sequencing'/exp OR  
'sensitivity and specificity'/exp OR 'point of care  
testing'/exp OR 'Antigen'/exp OR 'Serology'/exp  
OR 'immunoglobulin G'/exp OR  
'immunoglobulin M'/exp OR 'Clustered  
Regularly Interspaced Short Palindromic  
Repeat'/exp OR 'CRISPR Cas system'/exp OR  
'differential Diagnosis'/exp OR pcr:ti,ab,kw,de  
OR 'digital droplet':ti,ab,kw,de OR 'next  
generation sequencing':ti,ab,kw,de OR 'point-  
of-care test':ti,ab,kw,de OR 'point of care  
tests':ti,ab,kw,de OR antigen:ti,ab,kw,de OR  
analyte:ti,ab,kw,de OR serology:ti,ab,kw,de OR  
Immunoglobulin:ti,ab,kw,de OR 'CRISPR-  
CAS':ti,ab,kw,de OR Diagnos\*:ti,ab,kw,de OR  
'turn around time':ti,ab,kw,de

AND 2020:py AND [english]/lim

842 results on 4/22/20
